# Supplementary material
Source: PubMed Central journal article supplement (PMC5467311)

## List of Supplementary Data

Table S1. Minimally deleted regions (MDR) of recurrent deletions.

Table S2. Clinical features of the patients in this study.

Table S3. Overall survival is correlated with total copy number events and somatic mutations.

Table S4. Details of the *RPS15* mutations in this study.

Figure S1. IGV Screen shot showing 17p deletions.

Figure S2. Overview of CNAs in the tumor samples of 200 independent CLL patients.

Figure S3. CNAs and somatic mutations in the 99 patients with both WES and SNP profiles.

Figure S4. Analysis of *TP53* and *SF3B1* mutations.

Figure S5. *RPS15* mutations.

Figure S6. GISTIC analysis discovered novel recurrent deletions in chromosomes 3p, 4p, 8p and 9p in del(17p) CLL.

Figure S7. Associations of del(17p) and chromosomal deletions at 8p, 3p, 4p, and 9p.

Figure S8. Overall survival in 17p patients with recurrent deletions.

Figure S9. IGV screen shot showing 3p deletions.

Figure S10. IGV screen shot showing 4p deletions.

Figure S11. IGV screen shot showing 8p deletions.

Figure S12. IGV screen shot showing 9p deletions.

Figure S13. Association between CNAs and complex karyotype.

Figure S14. Chromothripsis in del(17p) CLL samples.

Figure S15. Sanger sequencing of *TP53* with cnLOH at 17p.

**Table S1. Minimally deleted regions (MDR) in recurrent deletions.**

| Name     | Range                      | kbp  | Type | Genes                                                                          |
|----------|----------------------------|------|------|--------------------------------------------------------------------------------|
| 3p loss  | chr3:47,002,496-47,641,149 | 639  | loss | <i>CCDC12, NRADDP, SETD2, KIF9, KIF9-AS, KLHL18, PTPN23, SCAP, ELP6, CSPG5</i> |
| 4p loss  | chr4:29,549,906-30,935,298 | 1385 | loss | <i>PCDH7</i>                                                                   |
| 8p loss  | chr8:22,467,144-27,420,442 | 4953 | loss | <i>EGR3, DOCK5, U4, STC1</i> , and 44 other genes                              |
| 9p loss  | chr9:21,325,815-21,359,498 | 34   | loss | <i>KLHL9, IFNA6</i>                                                            |
| 17p loss | chr17:7,549,591-7,583,945  | 34   | loss | <i>ATP1B2, TP53</i>                                                            |

**Table S2. Clinical features of the patients in this study.**

|                                                             | <b>Wild type</b> | <b>Del(17p)</b> | <b>p-value</b> |
|-------------------------------------------------------------|------------------|-----------------|----------------|
| <b>n</b>                                                    | 208              | 69              |                |
| <b>Age at Diagnosis</b>                                     | 54 (32-78)       | 61 (38-86)      | 2.2e-05        |
| <b>RAI Stage at Sampling</b>                                |                  |                 |                |
| stage 0                                                     | 62 (32%)         | 5 (8%)          | 6.1e-05        |
| stage 1                                                     | 82 (42%)         | 23 (36%)        | 0.38           |
| stage 2                                                     | 32 (17%)         | 8 (12%)         | 0.55           |
| stage 3                                                     | 7 (4%)           | 12 (19%)        | 2.7e-04        |
| stage 4                                                     | 10 (5%)          | 16 (25%)        | 2.9e-05        |
| <b>Maximum lymph node size (long axis, cm), at Sampling</b> |                  |                 |                |
|                                                             | 2.5 (0-18.6)     | 3.4 (0-22)      | 2.2e-05        |
| >5 cm                                                       | 22 (15%)         | 21 (37%)        | 0.002          |
| >10 cm                                                      | 5 (4%)           | 3 (5%)          | 0.69           |
| <b>B2M, Median</b>                                          | 2.3 (1.1-7.5)    | 3.9 (1.6-16.5)  | 1.4e-09        |
| <b>B2M, &gt; ULN</b>                                        | 69 (39%)         | 51 (81%)        | 5.3e-09        |
| <b>Treatments Prior to Sampling</b>                         |                  |                 |                |
| Median number                                               | 1 (1-7)          | 3 (1-8)         | 0.002          |
| BTK inhibitors                                              | 3 (1%)           | 0 (0%)          | 0.58           |
| PI3K inhibitors                                             | 3 (1%)           | 0 (0%)          | 0.58           |
| Bendamustine Based                                          | 2 (1%)           | 15 (22%)        | 2.2e-08        |
| Fludarabine Based                                           | 29 (14%)         | 31 (45%)        | 3.6e-07        |
| Anti-CD20 Antibody                                          | 28 (13%)         | 36 (52%)        | 4e-10          |
| BCL2 inhibitors                                             | 0 (0%)           | 0 (0%)          |                |
| High Dose Methyl Prednisolone (HDMP)                        | 3 (1%)           | 4 (6%)          | 0.067          |
| Lenalidomide                                                | 2 (1%)           | 2 (3%)          | 0.26           |
| Alemtuzumab                                                 | 3 (1%)           | 1 (1%)          | 1              |
| <b>Treatments After Sampling</b>                            |                  |                 |                |
| Median number                                               | 1.5 (1-7)        | 2 (1-8)         | 0.5            |
| BTK inhibitors                                              | 19 (9%)          | 11 (16%)        | 0.12           |
| PI3K inhibitors                                             | 5 (2%)           | 3 (4%)          | 0.42           |
| Bendamustine Based                                          | 23 (11%)         | 2 (3%)          | 0.05           |
| Fludarabine Based                                           | 72 (35%)         | 8 (12%)         | 1.9e-04        |
| Anti-CD20                                                   | 98 (47%)         | 44 (64%)        | 0.018          |
| BCL2 inhibitors                                             | 4 (2%)           | 8 (12%)         | 0.002          |
| HDMP                                                        | 16 (8%)          | 37 (54%)        | 5.1e-15        |
| Lenalidomide                                                | 12 (6%)          | 0 (0%)          | 0.04           |
| Alemtuzumab                                                 | 16 (8%)          | 35 (51%)        | 1.1e-13        |

ULN: upper limit of normal; HDMP: high-dose methylprednisolone.

Numbers are medians followed by percentage or range of values in parenthesis.

**Table S3. Overall survival is correlated with total copy number events and somatic mutations (Stratified by treatment status at sampling). (n=99)**

| <b>Univariable model</b>                   | <b>HR</b> | <b>95% CI</b> |       | <b>p-value</b> | <b>C-index</b> |
|--------------------------------------------|-----------|---------------|-------|----------------|----------------|
| Tot no. of copy number events: high vs low | 3.85      | 1.35          | 11.0  | 0.0012         | 0.765          |
| Tot no. of mutations: high vs low          | 6.82      | 2.09          | 22.21 | 0.0014         | 0.750          |
| <b>Multivariable model</b>                 |           |               |       |                |                |
| Tot no. of copy number events: high vs low | 5.749     | 1.93          | 17.11 | 0.0017         | 0.850          |
| Tot no. of mutations: high vs low          | 9.14      | 2.66          | 31.41 | 0.00045        |                |

Cutoff values for total number of mutations: 21; total number of CNA events: 4.

**Table S4. Details of the *RPS15* mutations in this study.**

| <b>Hugo Symbol</b> | <b>Sample Code</b> | <b>FISH Del17p</b> | <b>Genome Change</b> | <b>Protein Change</b> | <b>Alt</b> | <b>Ref</b> | <b>Treatment</b>     |
|--------------------|--------------------|--------------------|----------------------|-----------------------|------------|------------|----------------------|
| <i>RPS15</i>       | CW163              | Yes                | g.chr19:1440458G>C   | p.K145N               | 6          | 10         | Previously untreated |
| <i>RPS15</i>       | CW224              | No                 | g.chr19:1440438T>G   | p.S139A               | 20         | 43         | Previously untreated |
| <i>RPS15</i>       | CW32               | No                 | g.chr19:1440417G>A   | p.G132S               | 5          | 5          | Previously untreated |
| <i>RPS15</i>       | SS171              | Yes                | g.chr19:1440414C>T   | p.P131S               | 11         | 34         | Previously untreated |
| <i>RPS15</i>       | SS181a             | Yes                | g.chr19:1440439C>T   | p.S139F               | 19         | 53         | Previously untreated |
| <i>RPS15</i>       | SS190              | Yes                | g.chr19:1440432C>G   | p.H137D               | 19         | 17         | Previously treated   |
| <i>RPS15</i>       | SS201              | No                 | g.chr19:1440414C>T   | p.P131S               | 13         | 21         | Previously untreated |
| <i>RPS15</i>       | SS202              | Yes                | g.chr19:1440429A>G   | p.T136A               | 28         | 25         | Never treated        |
| <i>RPS15</i>       | SS185              | Yes                | g.chr19:1440457A>T   | p.K145M               | 19         | 26         | Previously treated   |

Alt: alternative allele read count. Ref: reference allele read count.

**Figure S1. IGV screen shot showing 17p deletions.** The minimally deleted region (MDR) is marked between the red lines.

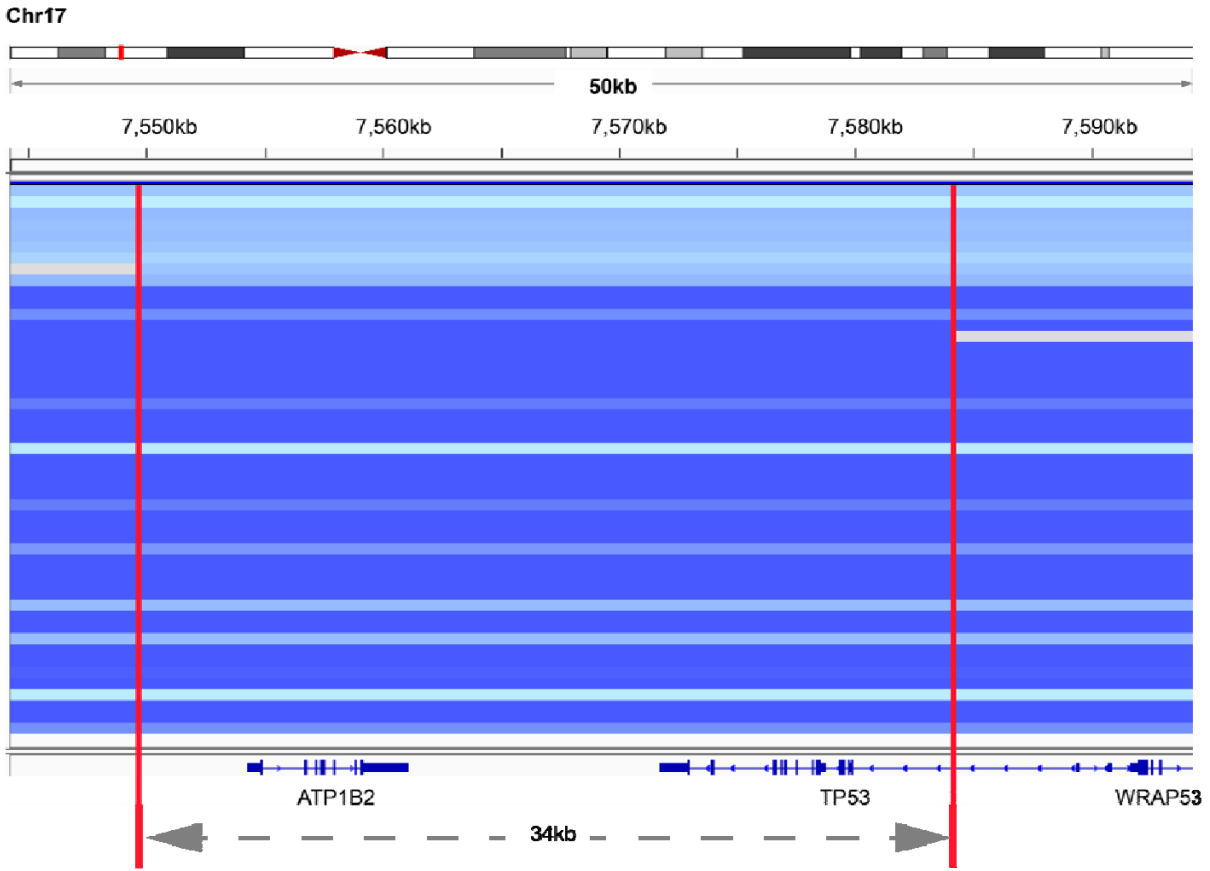

**Figure S2. Overview of CNAs in the tumor samples of 200 independent CLL patients.**

Each vertical track represents the copy number status of one tumor sample. The copy number value is color-coded as shown in the legend. The green line separates the 17p wild type samples from the 17p deletion samples. Samples are arranged by their treatment status.

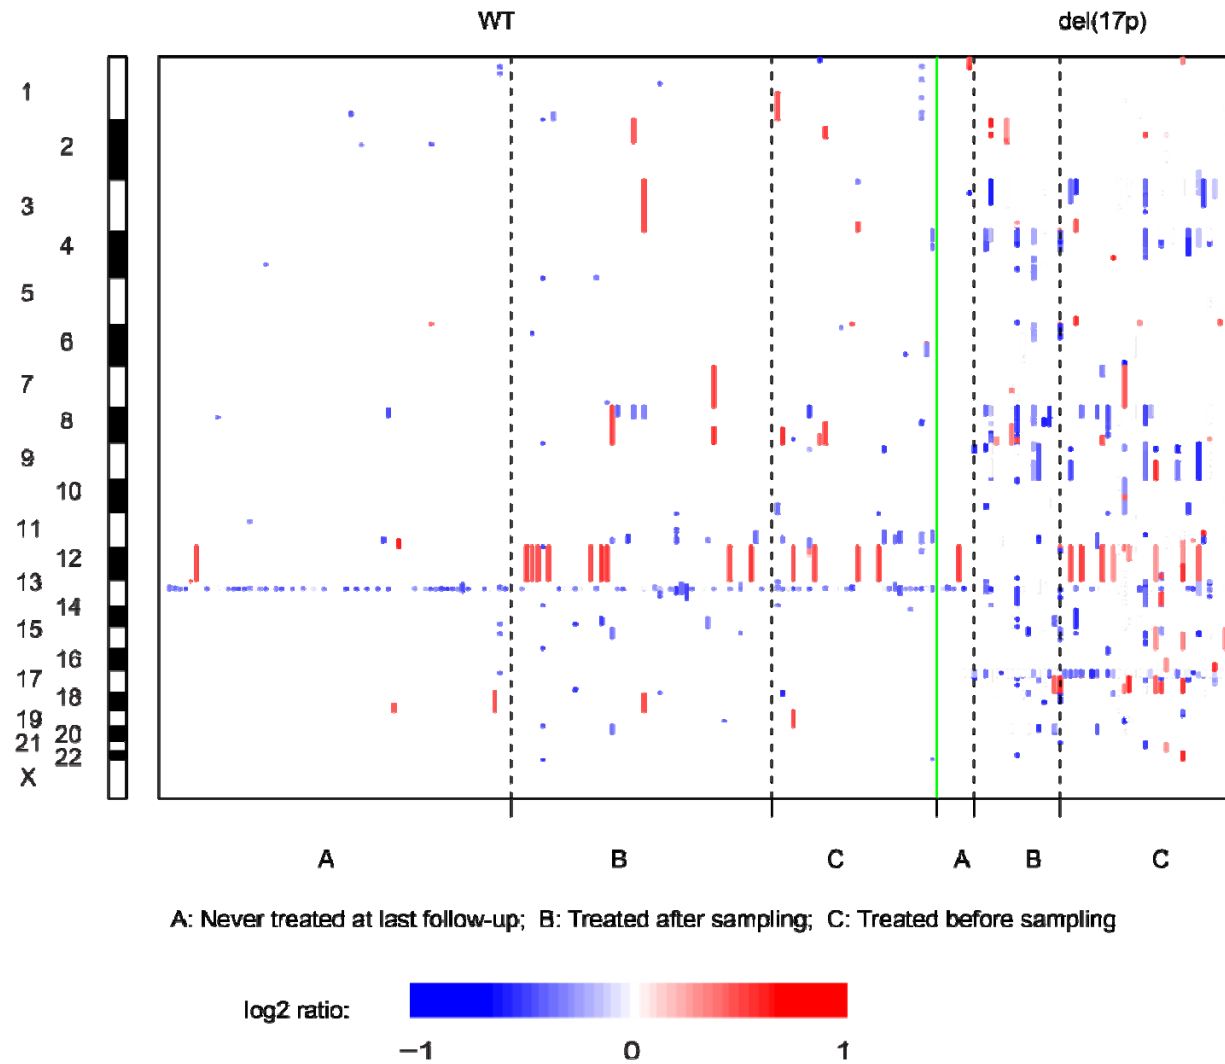

**Figure S3. CNAs and somatic mutations in the 99 patients with both WES and SNP**

**profiles.** A-C: Correlations between numbers of CNA and somatic mutations. Blue lines represent linear fitting of the data points. D: Overall survival in patient groups stratified by total CNAs and somatic mutations. Cutoff for CNAs is 4 events, Cutoff for mutations is 21.

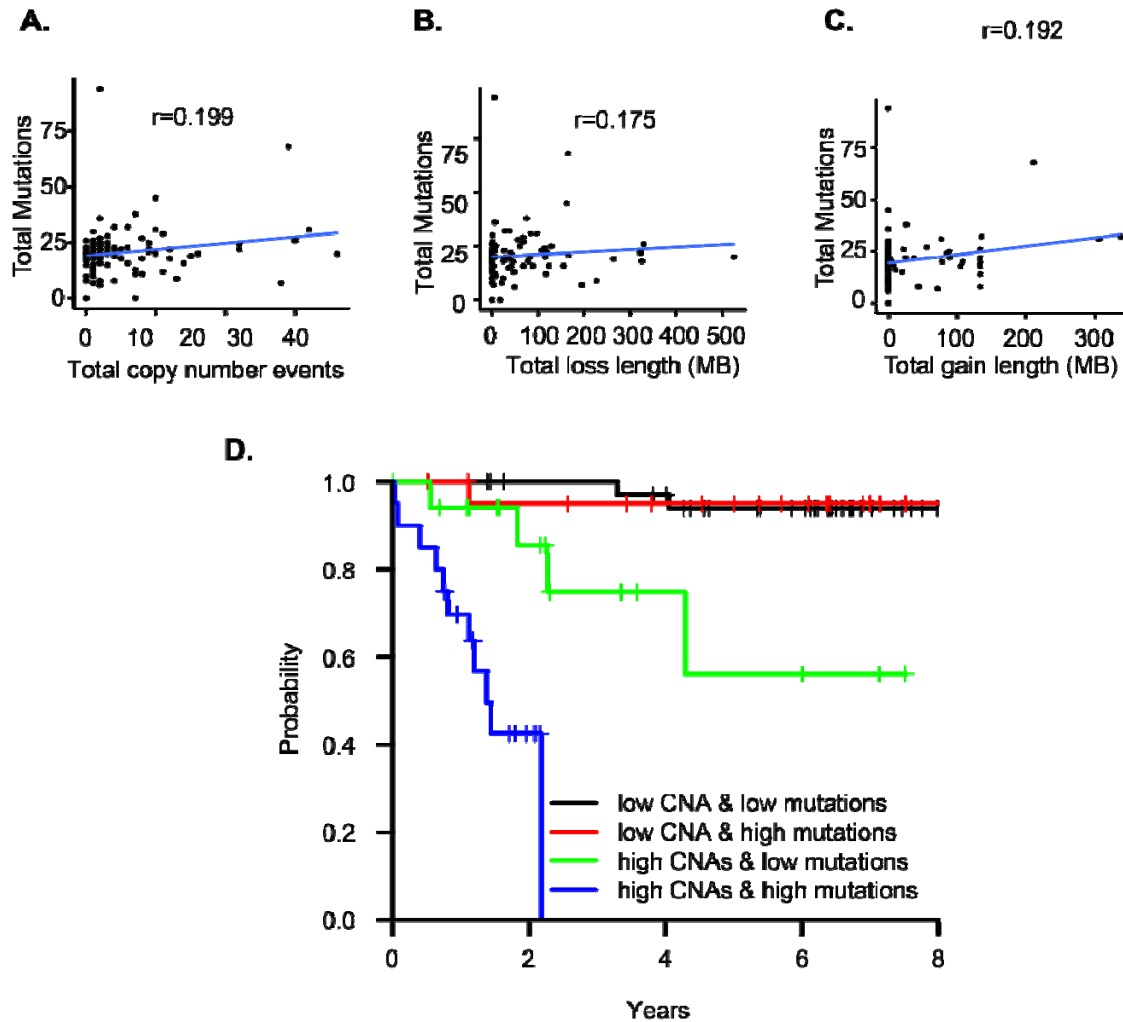



**Figure S4. Analysis of *TP53* and *SF3B1* mutations.** A. Heatmap of 59 tumor samples that have either *TP53* mutations or 17p deletions (single null) or both (double null). Two samples with *TP53* mutation but without 17p deletion were found to have copy neutral LOH and are therefore classified as double null. Samples without *TP53* disruption (i.e. wild type) are not shown in the heatmap (N= 117). B. Cancer cell fractions of the *SF3B1* mutations in each patient. C. Kaplan-Meier curves of OS by the clonality status of *SF3B1* mutations.

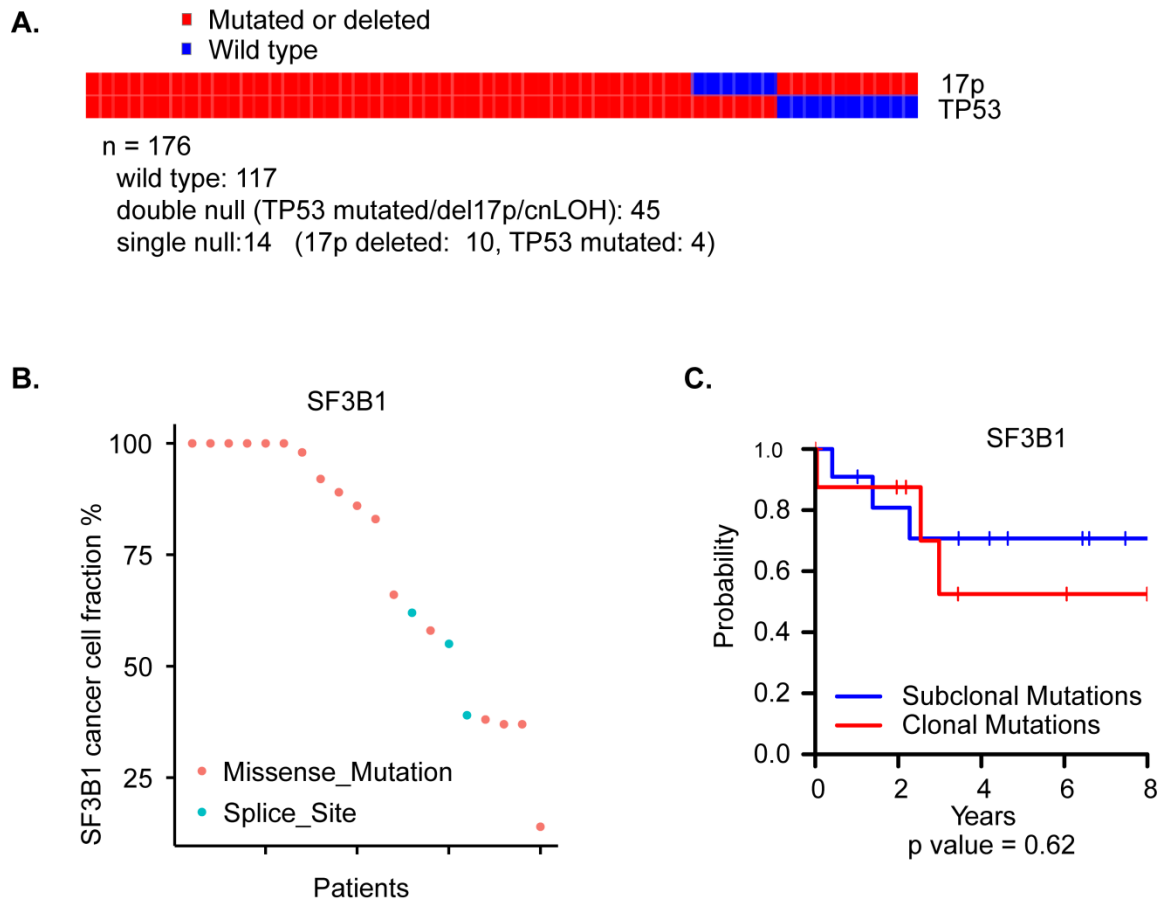

**Figure S5. *RPS15* mutations.** A. Sanger sequencing of genomic DNA confirming the C->T transition in a representative sample. B. Screenshot of RNA sequencing showing that a T->G mutation is transcriptionally expressed. C. Schematic representation of the 4 exons of *RPS15*, with *RPS15* mutations identified by WES. Exon lengths are not drawn to scale. D. Overall survival analysis of *RPS15* and del(17p).

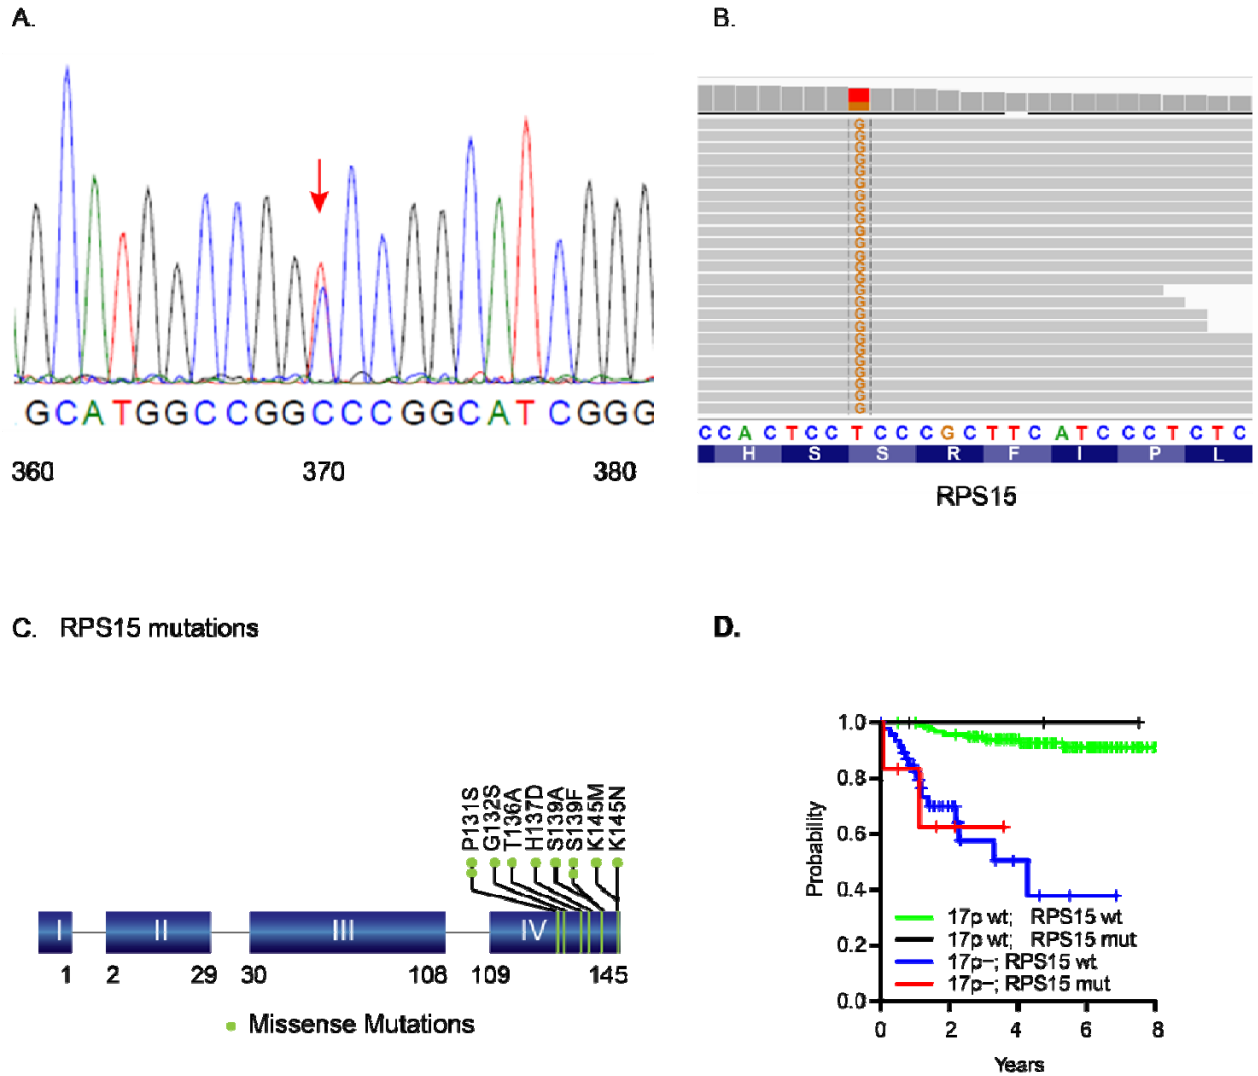

**Figure S6. GISTIC analysis discovered novel recurrent deletions in chromosomal 3p, 4p, 8p and 9p in del(17p) CLL. The green lines indicate the q value cutoff of 0.05.**

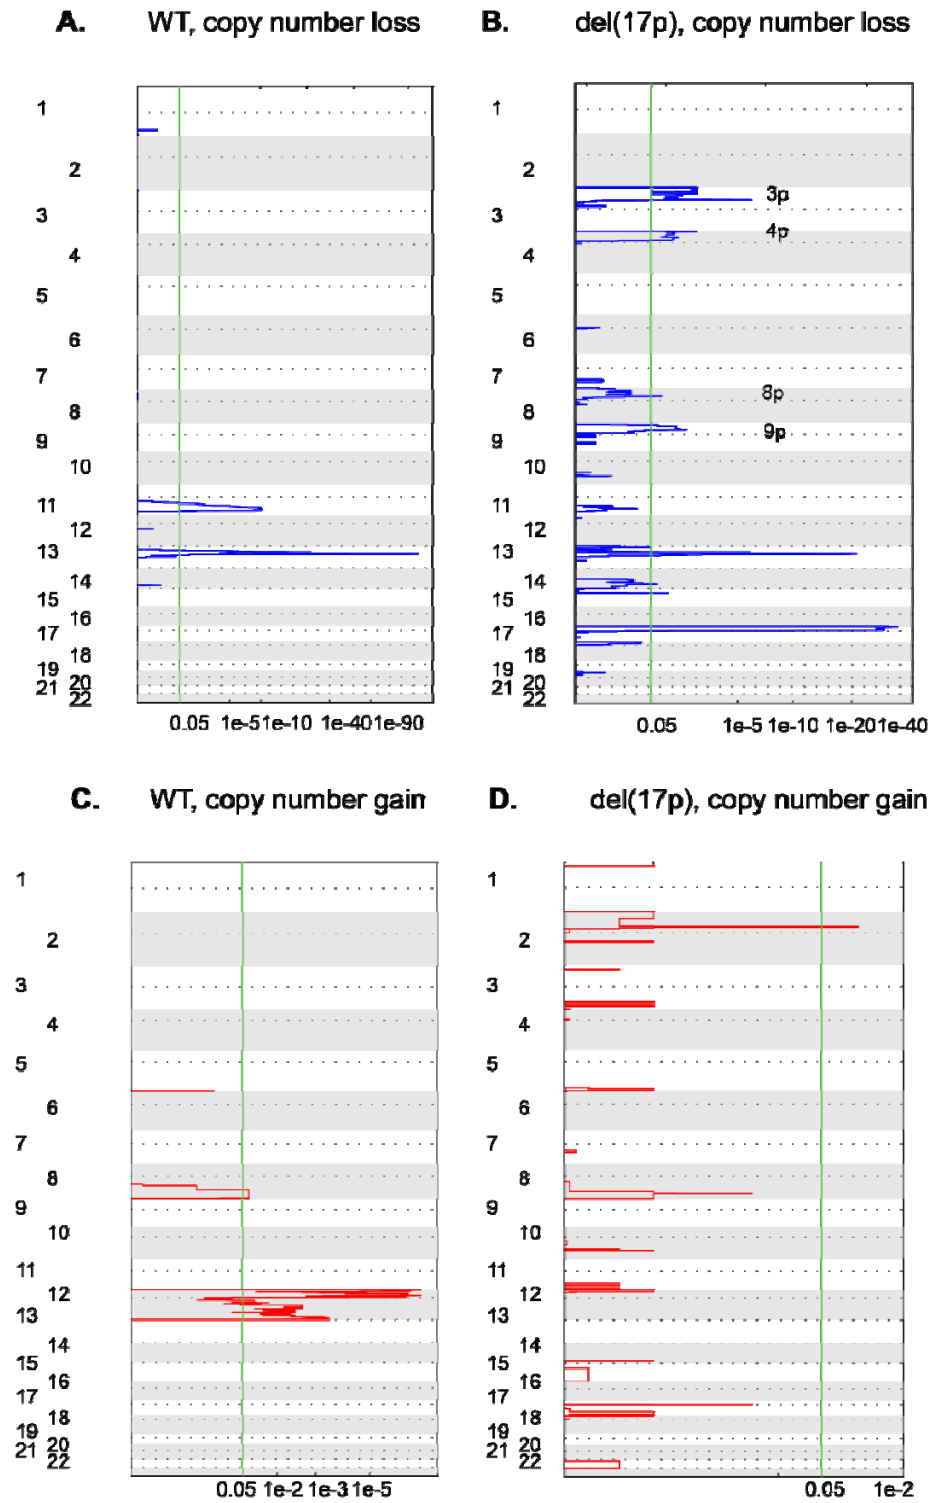

Figure S7. Association of del(17p) and chromosomal deletions at 8p, 3p, 4p, and 9p.

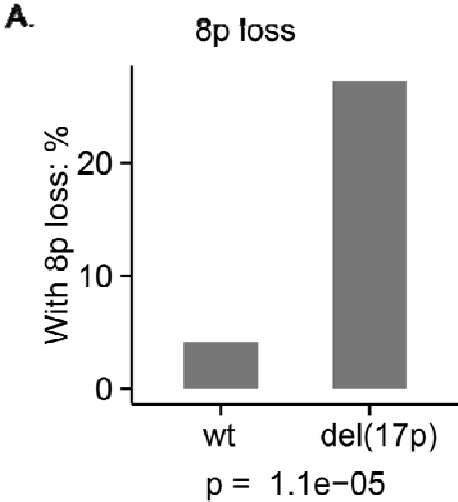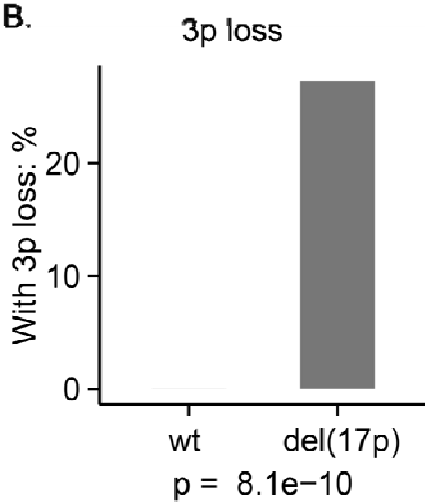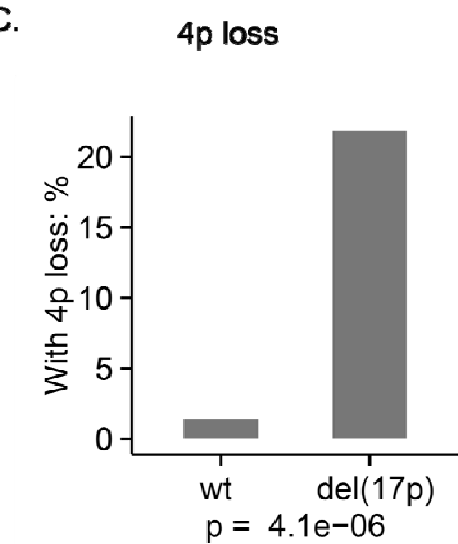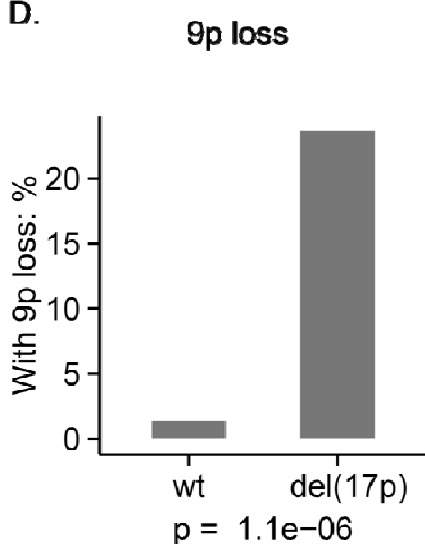

**Figure S8. Overall survival in del(17p) patients with recurrent deletions.** A. 17p wt vs del(17p). B. del(17p) alone vs del(17p) with 3p-. C. del(17p) alone vs del(17p) with 4p-. D. del(17p) alone vs del(17p) with 9p.

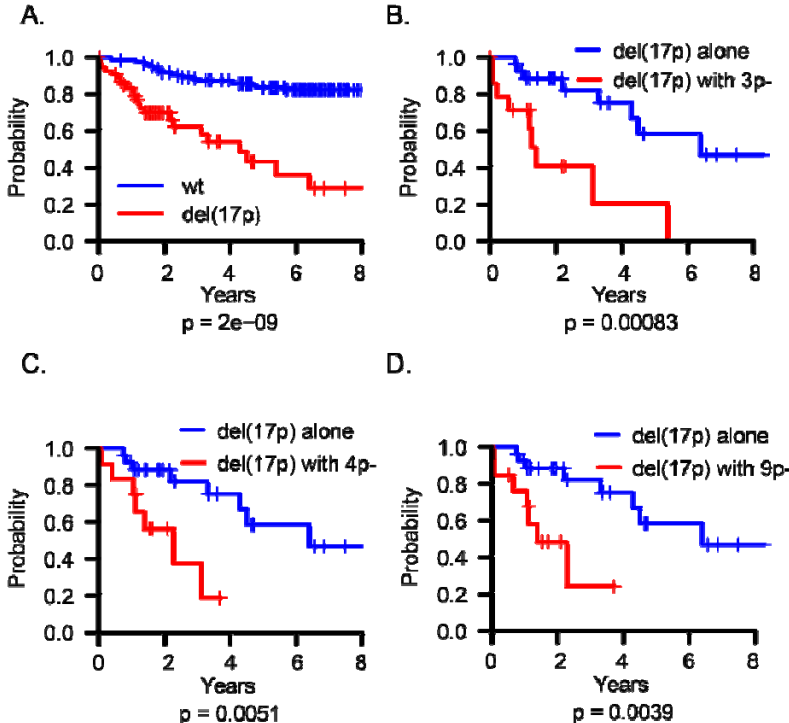

Figure S9. IGV screen shot showing 3p deletions. The MDR is marked between the red lines.

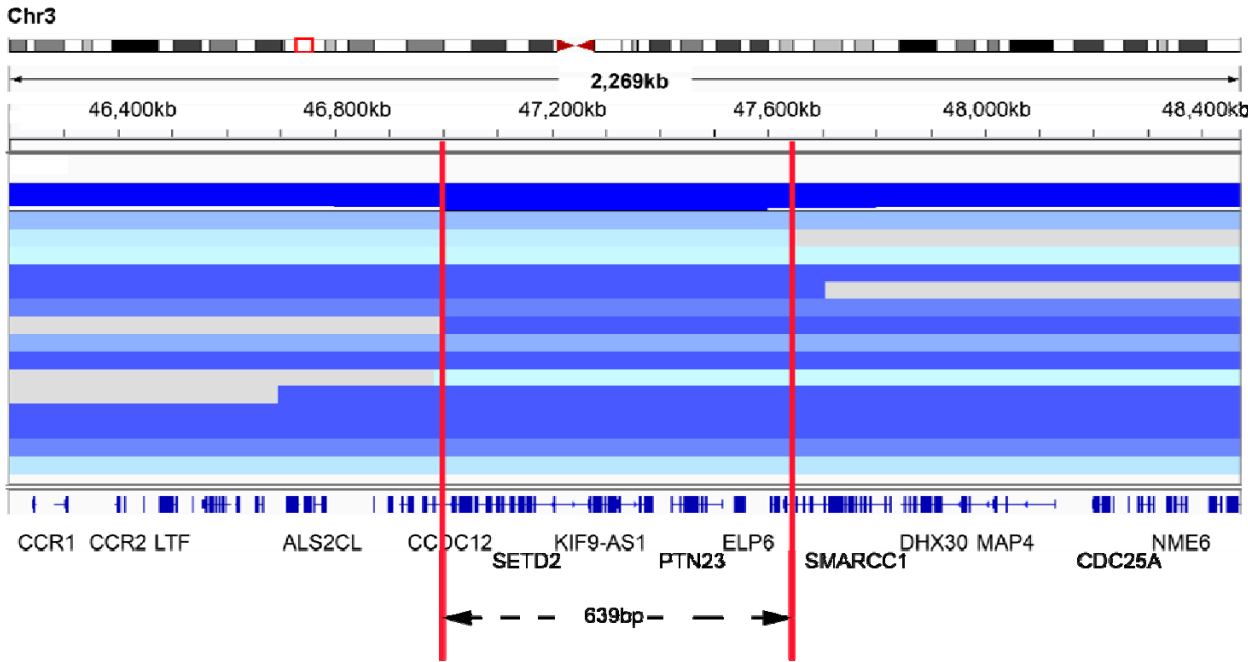

**Figure S10. IGV screen shot showing 4p deletions.** The MDR is marked between the red lines.

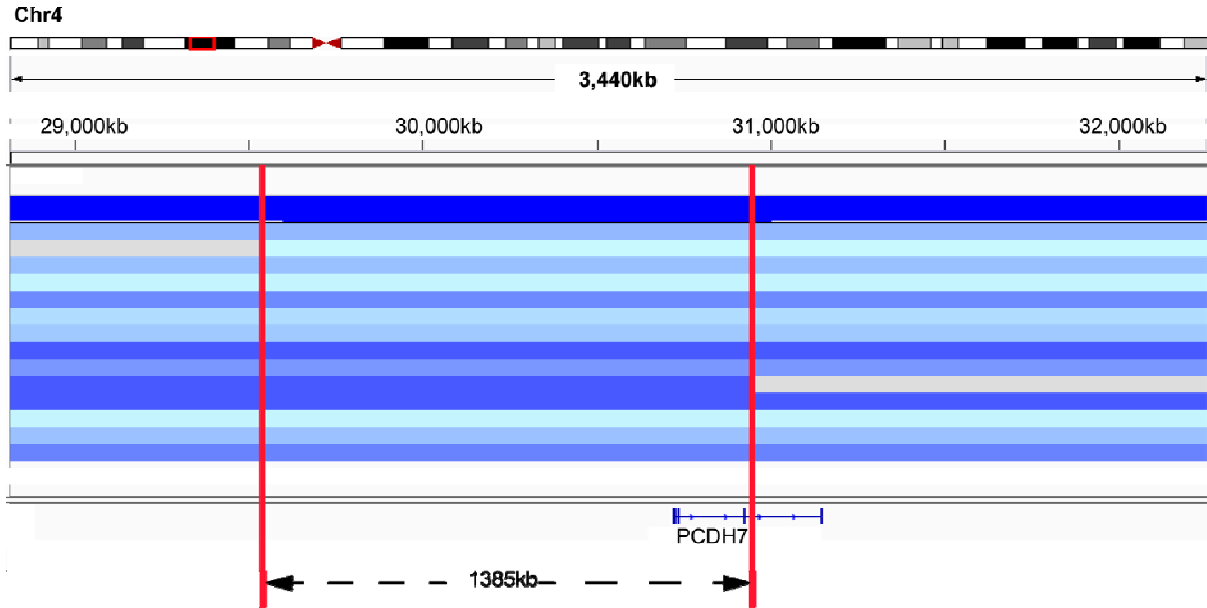

**Figure S11. IGV screen shot showing 8p deletions.** The MDR is marked between the red lines.

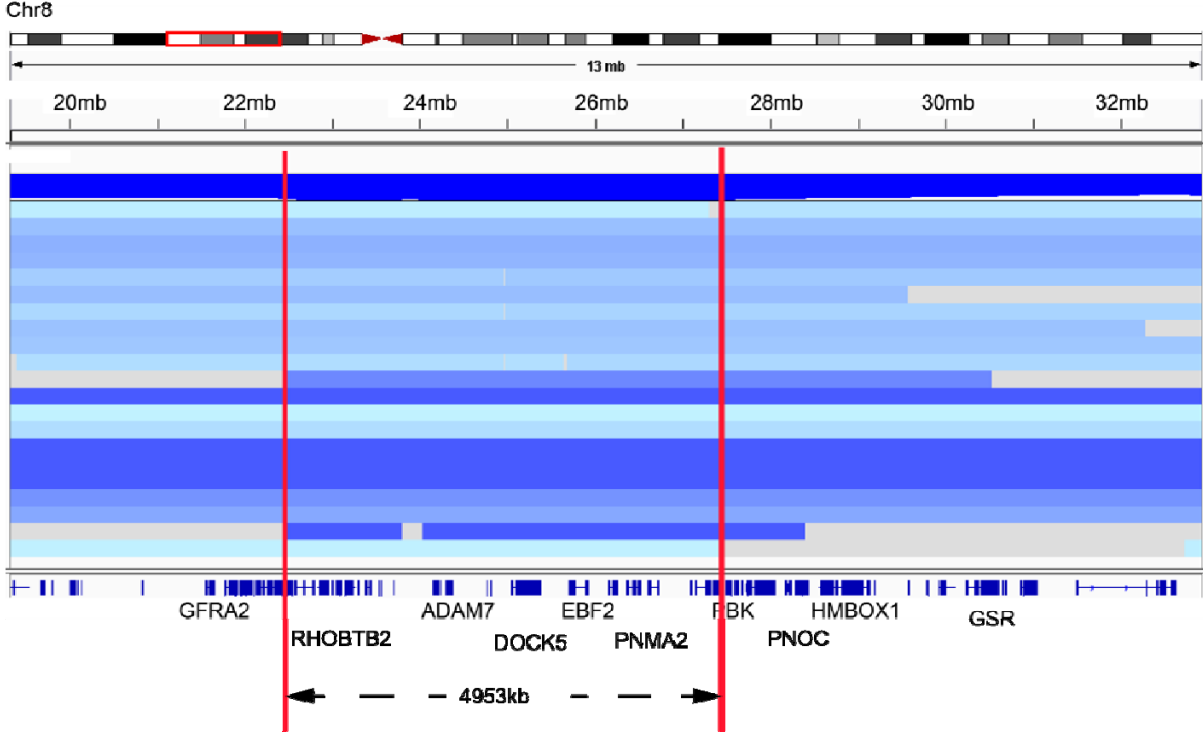



**Figure S12. IGV screen shot showing 9p deletions.** The MDR is marked between the red lines.

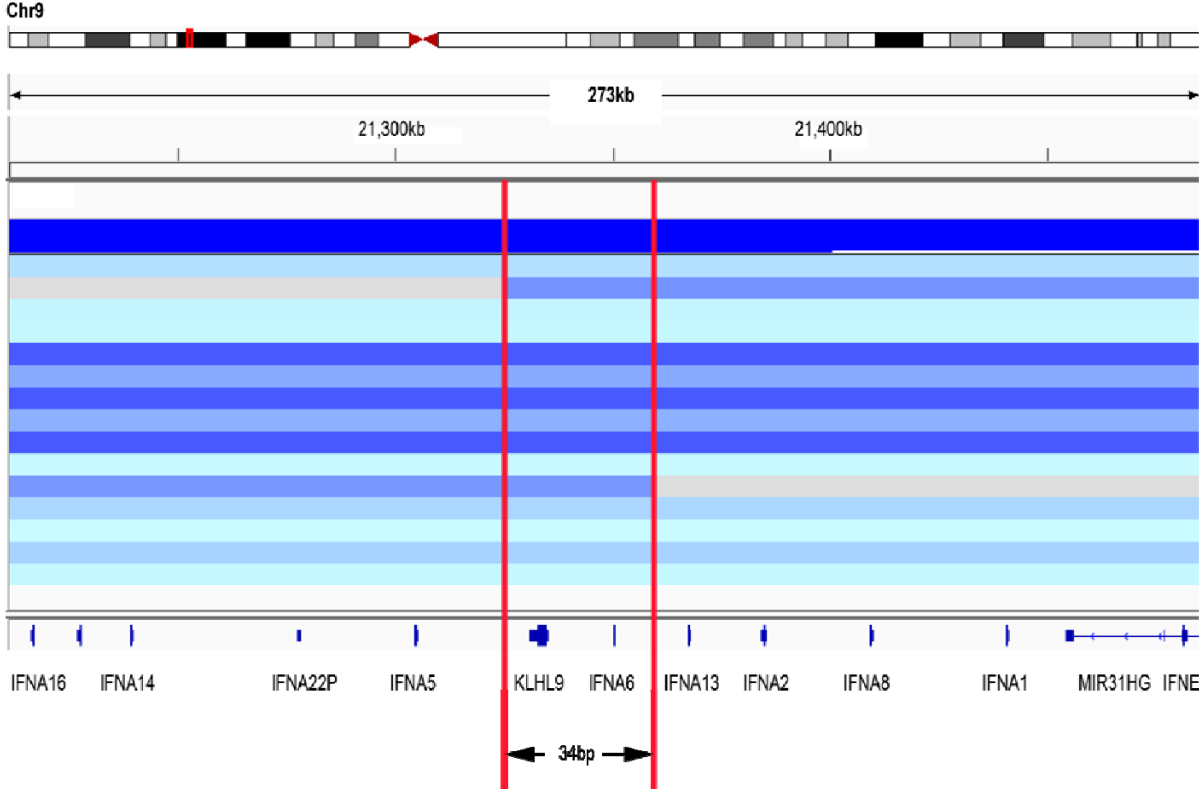

Figure S13. Association between number of CNAs and complex karyotype (CKT).

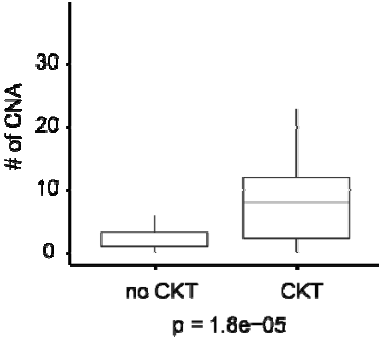

**Figure S14. Chromothripsis in del(17p) CLL samples.** Figure 14A depicts a likely chromothripsis event on chr8p in sample SS165. Figure 14B shows a likely chromothripsis event, followed by a likely chromoanasythesis event in sample SS192. The karyotype is represented in the upper panel of both figures. The chromosomal alterations for the tumor sample (magenta) and the matched normal (green) are shown in the lower panel. Included tracks are weighted log<sub>2</sub> ratio, copy number states (loss-red, gain-blue), mosaic copy number states, loss of heterozygosity (purple), allele peaks, smooth signal and the chromosome ideogram (expanded view also shown in the right panel). Chromothripsis is evident by the presence of alternating states of DNA copy number and allele ratios.

**A.**

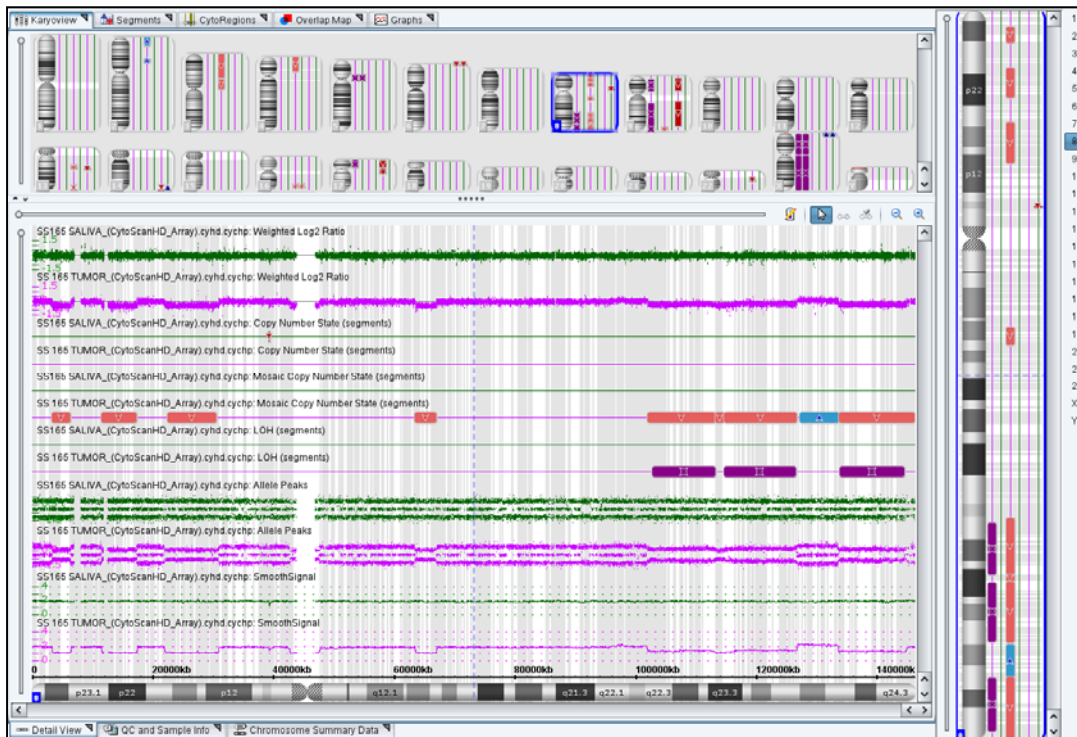

B.

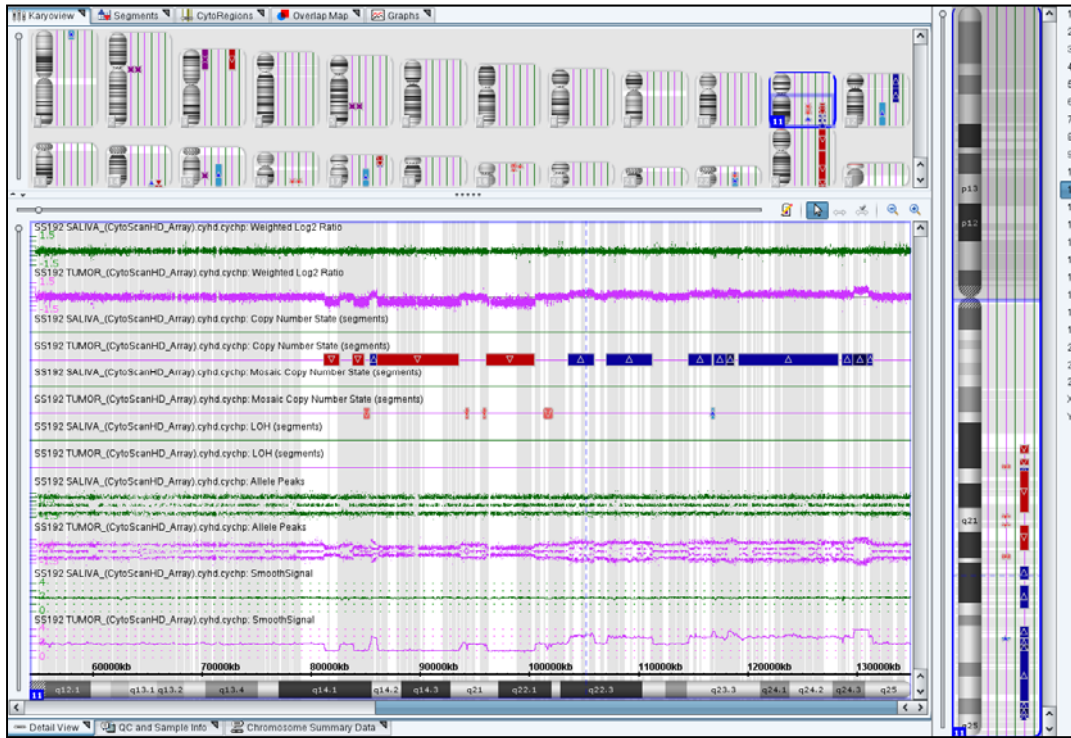

**Figure S15. Sanger sequencing of *TP53* with cnLOH at 17p.** Arrow indicates the A>G mutation in exon 5.

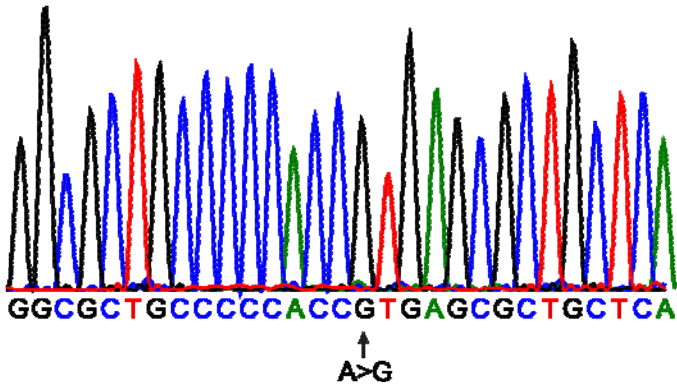

Supplement: NIHMS809294-supplement-1.pdf [file NIHMS809294-supplement-1.pdf]
